# Supplementary material for: Potential risk factors and triggers for back pain in children and young adults. A scoping review, part I: incident and episodic back pain
Source: PubMed Central journal article supplement (PMC6862727; doi:10.1186/s12998-019-0280-9), 2019-11-19
Supplement: 12998_2019_280_MOESM2_ESM.pdf [file 12998_2019_280_MOESM2_ESM.pdf]

**Additional file 2: INCEPTION COHORT STUDIES reporting factors that are longitudinally associated with back pain.**

Back pain, sample characteristics and associations between back pain and risk factors of back pain. Inception Cohorts

| Reference<br>(year of pub),<br>country,<br>pop size | Back Pain |     |     |   |                                                  | Characteristics of study sample |      |                                       | Significant positive (+) or negative (-) associations with back pain |      |      |        |                       |                                                                                                                                                                          |
|-----------------------------------------------------|-----------|-----|-----|---|--------------------------------------------------|---------------------------------|------|---------------------------------------|----------------------------------------------------------------------|------|------|--------|-----------------------|--------------------------------------------------------------------------------------------------------------------------------------------------------------------------|
|                                                     | MBP       | LBP | Mix | ? | Clear definition of BP (x/4) (Additional file 4) | Age range at baseline           | Sex  | No. of follow ups<br>Follow-up period | Female                                                               | Male | Age  | Height | Socioeconomic factors | Significant estimates (95% CI)                                                                                                                                           |
| [23] Aartun, (2016), Denmark, 144                   | X         | X   | X   |   | 4/4                                              | 11-13                           | Both | 1<br>2 years                          | (NT)                                                                 | (NT) | (NT) | (NT)   | (NT)                  |                                                                                                                                                                          |
| [24] Barke, (2014), Germany, 2040                   |           |     |     | X | 2/4                                              | 9-14                            | Both | 1<br>1 year                           | +                                                                    | (NT) | +    | (NT)   | (NT)                  | Female: OR 1.8 (1.1-3.1)<br>Age: OR 1.2 (1.1-1.3)                                                                                                                        |
| [25] Burton, (1996), England, 216                   |           | X   |     |   | 3/4                                              | 11                              | Both | 4<br>1 year                           |                                                                      | +    | +    | (NT)   | (NT)                  | Males: prevalence percentage boys 60%, girls 40% (Female: OR 0.4 (0.3-0.8) (calculated))<br>Older age 11 yrs: 12% 15 yrs: 22% (Older age: OR 2.1 (1.2-3.7) (calculated)) |
| [26] Mustard, (2005), Canada, 1043                  |           |     |     | X | 3/4                                              | 4-16                            | Both | 2<br>4 years,<br>14 years             | 0                                                                    | 0    | 0    | (NT)   | +                     | Lower parental education: OR 1.7 (1.1-2.8)                                                                                                                               |
| [27] Newcomer, (1996), USA 96                       |           | X   |     |   | 4/4                                              | 10-19                           | Both | 1<br>4 years                          | 0                                                                    | 0    | +    | (NT)   | (NT)                  | Older age OR 3.4 (graph interpretation)                                                                                                                                  |
| [28] Poussa, (2005), Finland, 430                   |           | X   |     |   | 3/4                                              | 10-11                           | Both | 5<br>1 year (4x), 8 years (1)         | 0                                                                    | 0    | (NT) | +      | (NT)                  | Increased growth spurt of one SD (4.3cm) from 11-14 years: OR 1.3 (1.1-1.7)                                                                                              |
| [29] Triki, (2015), Tunisia, 5958                   |           | X   |     |   | 3/4                                              | 18-24                           | Both | 7<br>1 year                           | +                                                                    |      | (NT) | (NT)   | (NT)                  | Female: Female 17%, male 13% (Female: OR 1.5 (1.3-1.7) (posthoc)) (the sex differences disappeared when looking at individual sports)                                    |

Pub: Publication, MBP: Mid-back pain, LBP: low back pain: BP: back pain, (NT): Not tested, + significant positive association, - significant negative association, 0: tested but non-significant estimate, CI: confidence interval, OR: odds ratio, SD: standard deviation, RR: relative risk, No.: number

Back pain, sample characteristics and associations between back pain and risk factors of back pain continued. Inception cohorts

| Reference<br>(year of pub),<br>country,<br>pop size | Back Pain |     |     |   | Characteristics of study sample                        |                             |      | Significant positive (+) or negative (-) associations with back pain |      |                    |              |                               |         |         |                                                                                                                                                                                                                   |
|-----------------------------------------------------|-----------|-----|-----|---|--------------------------------------------------------|-----------------------------|------|----------------------------------------------------------------------|------|--------------------|--------------|-------------------------------|---------|---------|-------------------------------------------------------------------------------------------------------------------------------------------------------------------------------------------------------------------|
|                                                     | MBP       | LBP | Mix | ? | Clear definition<br>of BP (x/4)<br>(Additional file 4) | Age<br>range at<br>baseline | Sex  | Follow-up<br>period                                                  | BMI  | Muscle<br>strength | Psychosocial | Physical<br>activity/<br>work | Smoking | Illness | Significant estimates<br>(95% CI)                                                                                                                                                                                 |
| [23] Aartun,<br>(2016),<br>Denmark,<br>144          | X         | X   | X   |   | 4/4                                                    | 11-13                       | Both | 1<br>2 years                                                         | (NT) | (NT)               | (NT)         | +                             | (NT)    | (NT)    | High level physical activity: RR 1.4 (1.1-1.9)                                                                                                                                                                    |
| [24] Barke,<br>(2014),<br>Germany,<br>2040          |           |     |     | X | 2/4                                                    | 9-14                        | Both | 1<br>1 year                                                          | (NT) | (NT)               | +            | (NT)                          | (NT)    | (NT)    | Dysfunctional coping: OR 1.4 (1.1-2.0)<br>(boys)<br>Anxiety sensitivity:<br>OR 1.5 (1.1-2.0) (boys)<br>Somatosensory amplification:<br>OR 1.8 (1.0-3.1) (girls)<br>Pain catastrophizing: OR 0.5 (0.3-0.9) (girls) |
| [25] Burton,<br>(1996),<br>England,<br>216          |           | X   |     |   | 3/4                                                    | 11                          | Both | 4<br>1 year                                                          | (NT) | (NT)               | (NT)         | (NT)                          | (NT)    | (NT)    |                                                                                                                                                                                                                   |
| [26] Mustard,<br>(2005),<br>Canada,<br>1928         |           |     |     | X | 3/4                                                    | 4-16                        | Both | 2<br>4 years,<br>14 years                                            | 0    | (NT)               | +            | 0                             | +       | 0       | Heavy smoking: OR 1.9 (1.1-3.1)<br>Psychological distress:<br>OR 1.9 (1.1-3.0) (low), OR 1.9 (1.1-3.2)<br>(mod/high)<br>Emotional or behavioural disorders:<br>OR 1.9 (1.0-3.4)                                   |
| [27] Newcomer,<br>(1996),<br>USA<br>96              |           | X   |     |   | 4/4                                                    | 10-19                       | Both | 1<br>4 years                                                         | (NT) | +                  | (NT)         | +                             | (NT)    | (NT)    | Increased level of physical activity: OR 2.3<br>(graph interpretation)<br>Stronger back flexors: OR 2.8 (graph<br>interpretation)                                                                                 |
| [28] Poussa,<br>(2005),<br>Finland,<br>430          |           | X   |     |   | 3/4                                                    | 10-11                       | Both | 5<br>1 year<br>(4x), 8<br>years (1)                                  | 0    | (NT)               | (NT)         | (NT)                          | (NT)    | (NT)    |                                                                                                                                                                                                                   |
| [29] Triki,<br>(2015),<br>Tunisia,<br>5958          |           | X   |     |   | 3/4                                                    | 18-24                       | Both | 7<br>1 year                                                          | (NT) | (NT)               | (NT)         | (NT)                          | (NT)    | (NT)    |                                                                                                                                                                                                                   |

Pub: Publication, MBP: Mid-back pain, LBP: low back pain: BP: back pain, (NT): Not tested, + significant positive association, - significant negative association, 0: tested but non-significant estimate, CI: confidence interval, OR: odds ratio, SD: standard deviation, RR: relative risk, No.: number
