# Supplementary material for: Potential risk factors and triggers for back pain in children and young adults. A scoping review, part I: incident and episodic back pain
Source: PubMed Central journal article supplement (PMC6862727; doi:10.1186/s12998-019-0280-9), 2019-11-19
Supplement: 12998_2019_280_MOESM3_ESM.pdf [file 12998_2019_280_MOESM3_ESM.pdf]

**Additional file 3: COHORT STUDIES reporting factors that are longitudinally associated with back pain episodes.**

**Back pain, sample characteristics and associations between back pain and temporal precursor variables. Cohort Studies**

| Reference<br>Ref,<br>(year of pub),<br>country,<br>pop size | Back pain |     |     |   | Characteristics of study sample                        |                             |      | Significant positive (+) or negative (-) associations with back pain |        |      |     |                                                                                                                                                                                                                                                                                                                                                                                                                                |
|-------------------------------------------------------------|-----------|-----|-----|---|--------------------------------------------------------|-----------------------------|------|----------------------------------------------------------------------|--------|------|-----|--------------------------------------------------------------------------------------------------------------------------------------------------------------------------------------------------------------------------------------------------------------------------------------------------------------------------------------------------------------------------------------------------------------------------------|
|                                                             | MBP       | LBP | Mix | ? | Clear definition<br>of BP (x/4)<br>(Additional file 5) | Age<br>range at<br>baseline | Sex  | No. of<br>follow<br>ups<br>Follow-up<br>period                       | Female | Male | Age | Significant estimates<br>(95% CI)                                                                                                                                                                                                                                                                                                                                                                                              |
| [30] van<br>Gessel,<br>(2011),<br>Germany,<br>2025          |           |     |     | X | 2/4                                                    | 9-14                        | Both | 3<br>1 year                                                          | +      |      | +   | Females: OR 2.1 (1.9-2.5)<br>Age: 9yr boy: OR 1 (index)<br>2.5 (1.5, 4.1) (13, boy), 3.2 (1.9, 5.3) (14, boy), 3.1 (1.8, 8.2) (15, boy), 3.0 (1.8, 5.2) (16,<br>boy), 3.5 (1.9, 6.3) (17 boy), 2.4 (1.4, 4.1) (10 girl), 3.4 (2.1, 5.7) (11, girl), 4.6 (2.8, 7.5)<br>(12, girl), 5.6 (3.4, 9.2) (13, girl), 5.4 (3.3, 8.9) (14, girl), 6.7 (4.1, 11.2) (15, girl), 6.7 (4.0,<br>11.3) (16, girl), 7.5 (4.2, 13.2) (17, girl). |

Pub: Publication, MBP: Mid-back pain, LBP: low back pain: BP: back pain, + significant positive association, OR: odds ratio, No.: number
