# Supplementary material for: Potential risk factors and triggers for back pain in children and young adults. A scoping review, part I: incident and episodic back pain
Source: PubMed Central journal article supplement (PMC6862727; doi:10.1186/s12998-019-0280-9), 2019-11-19
Supplement: 12998_2019_280_MOESM4_ESM.pdf [file 12998_2019_280_MOESM4_ESM.pdf]

**Additional file 4: Clarity of definitions of Back pain: Inception Cohort studies**

| Ref<br>(year of pub)     | Area of BP<br>(1 point) | Recall period<br>(1 point) |              |               |              |             |              | Type<br>(1 point)                                    | Severity<br>described | Consequences reported                  | Attempted to collect valid data<br>(1 point)      | Conclusion                      |
|--------------------------|-------------------------|----------------------------|--------------|---------------|--------------|-------------|--------------|------------------------------------------------------|-----------------------|----------------------------------------|---------------------------------------------------|---------------------------------|
|                          | Location                | Now                        | Past<br>week | Past<br>month | Past<br>year | > 1<br>year | pain<br>ever | -1 <sup>st</sup> ever<br>-Episodic<br>-Ongoing<br>-? |                       | -Seek care<br>-Downtime<br>-Disability |                                                   | Clear definition of BP<br>(x/4) |
| [23] Aartun,<br>(2016)   | MB/LB*                  |                            |              |               |              |             | X            | -1 <sup>st</sup> ever<br>-<br>-<br>-                 | No                    | -<br>-<br>-                            | Diagram used, pilot study of the<br>questionnaire | 4/4                             |
| [24] Barke,<br>(2014)    | ?                       |                            |              | X (6<br>mth)  | X            |             | X            | -1 <sup>st</sup> ever<br>-<br>-<br>-                 | No                    | -<br>-<br>-                            | NR                                                | 2/4                             |
| [25] Burton,<br>(1996)   | LB                      | X                          |              |               | X            |             | X            | -1 <sup>st</sup> ever<br>-<br>-<br>-                 | No                    | -Seek care<br>-<br>-Disability         | NR                                                | 3/4                             |
| [26] Mustard,<br>(2005)  | ?                       |                            |              |               | X            |             | X            | -1 <sup>st</sup> ever<br>-<br>-<br>-                 | No                    | -<br>-<br>-Disability                  | Used a pre-validated<br>questionnaire             | 3/4                             |
| [27] Newcomer,<br>(1996) | LB                      |                            |              |               | X            |             | X            | -1 <sup>st</sup> ever<br>-<br>-<br>-                 | No                    | -Seek care<br>-Downtime<br>-           | Used a pre-validated<br>questionnaire             | 4/4                             |
| [28] Poussa,<br>(2005)   | LB                      |                            |              |               | X            |             | X            | -1 <sup>st</sup> ever<br>-<br>-<br>-                 | No                    | -<br>-<br>-                            | Diagram used                                      | 3/4                             |
| [29] Triki,<br>(2015)    | LB                      |                            |              |               |              | X           |              | -1 <sup>st</sup> ever<br>-<br>-<br>-                 | No                    | -Seek care<br>-<br>-                   | NR                                                | 3/4                             |

BP: back pain, LB: low back, MB: mid back, NR: not reported, mth: months, MB/LB\*: collected data from regions separately, however reported together as spinal pain
