# Supplementary material for: Potential risk factors and triggers for back pain in children and young adults. A scoping review, part I: incident and episodic back pain
Source: PubMed Central journal article supplement (PMC6862727; doi:10.1186/s12998-019-0280-9), 2019-11-19
Supplement: 12998_2019_280_MOESM5_ESM.pdf [file 12998_2019_280_MOESM5_ESM.pdf]

**Additional file 5: Clarity of definitions of Back pain: Cohort studies**

| Ref<br>(year of pub)    | Area of BP<br>(1 point)<br>Location | Recall period<br>(1 point) |              |               |              |             |              | Type<br>(1 point)<br>-1 <sup>st</sup> ever<br>-Episodic<br>-Ongoing<br>-? | Severity<br>described | Consequences reported<br>-Seek care<br>-Downtime<br>-Disability | Attempted to collect valid data<br>(1 point) | Conclusion<br><br>Clear definition of BP<br>(x/4) |
|-------------------------|-------------------------------------|----------------------------|--------------|---------------|--------------|-------------|--------------|---------------------------------------------------------------------------|-----------------------|-----------------------------------------------------------------|----------------------------------------------|---------------------------------------------------|
|                         |                                     | Now                        | Past<br>week | Past<br>month | Past<br>year | > 1<br>year | pain<br>ever |                                                                           |                       |                                                                 |                                              |                                                   |
| [30] van Gessel, (2011) | ?                                   |                            |              | X (6 mth)     |              |             |              | -<br>-Episodic<br>-<br>-                                                  | Yes                   | -<br>-<br>-                                                     | NR                                           | 2/4                                               |

BP: back pain, LB: low back, MB: mid back, NR: not reported, mth: months
